# Supplementary material for: Novel candidate genes for ECT response prediction—a pilot study analyzing the DNA methylome of depressed patients receiving electroconvulsive therapy
Source: PubMed Central journal article supplement (PMC7388224; doi:10.1186/s13148-020-00891-9), 2020-07-29
Supplement: 13148_2020_891_MOESM1_ESM.pdf [file 13148_2020_891_MOESM1_ESM.pdf]

## **SUPPLEMENTARY MATERIAL**

### **METHODS**

#### *Sample Processing*

#### **PBMC Isolation**

PBMCs were isolated by density centrifugation as described by Sieve et al. [100], though (based on the recommendations of Mallone et al. [101]) adaptations were made to meet our requirements. For the present work, PBMCs were isolated as follows: 17 ml of EDTA-blood was centrifuged (2000xg, 10 min, room temperature (RT)) and 4 ml of the resulting supernatant (=plasma) stored for other experiments. The removed volume was substituted with 4 ml of Dulbecco's Phosphate Buffered Saline (PBS, #L1825; Biochrom GmbH) and the monovettes inverted before transferring the blood into 50 ml tubes (#62.547.004; SARSTEDT AG & Co. KG). Afterward, monovettes were washed with PBS twice and further PBS added until a 1:2 dilution of the original blood volume was reached. Diluted blood was layered onto 12 ml of Biocoll<sup>®</sup> Separating Solution (#L6113; Biochrom GmbH) and subsequently centrifuged (2000xg, 20 min, RT) with the deceleration speed set to zero. The supernatant was removed (up to 5 ml above the buffy coat) and the cells transferred into a new 50 ml conical tube. PBMCs were washed with cold (4°C) PBS (supplemented with 1% bovine serum albumin (BSA, #A1470; SARSTEDT AG & Co. KG)) for three times (1200xg, 10 min, 4°C) before counting. For quantification, nonviable cells were marked with 0.2% trypan blue (#T6146; SIGMA-ALDRICH Co.), pipetted into a Neubauer chamber (#0640010; Paul Marienfeld GmbH & Co. KG) and visualized using an inverted CKX41 microscope (Olympus). After a final centrifugation step (1200xg, 10 min, 4°C), freshly prepared freezing medium (containing 10% dimethyl sulfoxide (DMSO, #41640-M; SIGMA-ALDRICH Co.) and 10% human serum (of the patient and time point, respectively) in PBS) served for the resuspension of the resulting cell pellet. Resuspended cells were then aliquoted (10-20x10<sup>6</sup> cells/ml; CryoPure Tubes (#72.380; SARSTEDT AG & Co. KG)), put into pre-cooled (4°C) Mr. Frosty<sup>™</sup> freezing containers (#5100-0001; Thermo Fisher Scientific; filled with isopropanol) and stored at -80°C for up to 72 h. To assure optimal preservation of the cells, PBMCs were kept in a liquid nitrogen tank (MVE Cryosystem 750, Jutta Ohst german-cryo<sup>®</sup> GmbH) until further processing.

#### **PBMC Thawing**

For the current work, PBMCs were thawed by keeping the cryotubes (that contained the cells) in a 37°C-warm water bath until only a small bit of ice remained. 1 ml of heated RPMI 1640 medium (#FG1215; Biochrom GmbH; 37°C, supplemented with 2% BSA) was subsequently added to each sample. Thawed PBMCs were then transferred into 50 ml tubes that contained 5 ml of the 2%-BSA-RPMI-medium (37°C). Afterward, 10 ml of the medium was additionally added. Cells were subsequently centrifuged (900xg, 5 min, 4°C) and fluorescence-activated cell sorting (FACS) buffer (=PBS supplemented with 1% BSA and

1mM UltraPure™ EDTA (#11568896; Invitrogen AG)) used for washing the cells for three times. PBMCs were then stored on ice for 30 min and manually quantified (0.2% trypan blue). The suspension was subsequently divided into 5 ml polypropylene tubes (#55.526.006; SARSTEDT AG & Co. KG), centrifuged (900xg, 5 min, 4°C) and the supernatant discarded. The cells were resuspended in 500 µl RNAprotect Cell Reagent (#76526; QIAGEN N.V.) and kept at 4°C until further processing (up to one week).

### **Genomic DNA Isolation from PBMCs and HeLa cells**

gDNA of PBMCs and HeLa cells was isolated using the AllPrep DNA/RNA 96 kit (#80311; QIAGEN N.V.). Minor changes have been applied to the manufacturer's instructions. In short, cells were centrifuged at 5000xg, 4°C for 5 min before isolation. The supernatant was discarded and 300 µl of RLT buffer (containing 1% β-Mercaptoethanol (#A1108; AppliChem GmbH)) added to each sample. Cell lysis was obtained by pulse vortexing (2x30 sec, 4°C) and subsequent storage on ice for at least 15 min. The lysates were pipetted into the wells of an AllPrep96 DNA plate, centrifuged (5600xg, 4 min, RT), and washed thrice (1x AW1 buffer, 2x AW2 buffer). For gDNA elution, each sample was incubated with 50 µl of heated (70°C) EB buffer for 5 min and subsequently centrifuged (4 min at 5600xg, RT). The elution was repeated, and the combined eluate stored at -80°C (PBMCs) or 4°C (HeLa cells) until further processing.

## **RESULTS**

### **Patients' Clinical Baseline Characteristics (n=12)**

Final DNAm analyses were performed using data from 12 patients only. After treatment completion, 8 responded to ECT. Three patients had minimal heightened levels for leukocytes ( $11.2-12.4 \times 10^3/\mu\text{l}$ ), but no signs of infection (i.e., elevated CRP). During ECT, patients were anesthetized with methohexital (mean=128.3(±57.8) mg, minimum=90 mg, maximum=250 mg) and remifentanyl (89.6(±58.2) mg, 30 mg, 200 mg) and received succinylcholine for muscle relaxation (121.7(±52.0) mg, 60 mg, 200 mg). Responders and non-responders differed only in their numbers of total leukocytes (t-test,  $p=0.048$ ,  $T=-2.249$ ) and the duration of their current episode (t-test,  $p=0.026$ ,  $T=2.948$ ).

| <b>Patients for final analysis</b>                                                          |        | Whole cohort (n=12)        | Responder (n=8)             | Non-responder (n=4)        |
|---------------------------------------------------------------------------------------------|--------|----------------------------|-----------------------------|----------------------------|
| <b>Demographics</b>                                                                         |        |                            |                             |                            |
| <b>Age in years, mean (<math>\pm</math>SD; range)</b>                                       |        | 53.6 ( $\pm$ 14.7; 24–70)  | 58.5 ( $\pm$ 10.3; 43–70)   | 43.8 ( $\pm$ 18.8; 24–67)  |
| <b>Gender, n (%)</b>                                                                        | female | 7 (58.3%)                  | 6 (75.0%)                   | 1 (25.0%)                  |
|                                                                                             | male   | 5 (41.7%)                  | 2 (25.0%)                   | 3 (75.0%)                  |
| <b>Body mass index, mean (<math>\pm</math>SD; range)</b>                                    |        | 27.1 ( $\pm$ 4.9; 20–39)   | 28.4 ( $\pm$ 4.8; 23–39)    | 24.5 ( $\pm$ 4.8; 20–30)   |
| <b>Smokers, n (%)</b>                                                                       | yes    | 6 (54.5%)                  | 5 (71.4%)                   | 1 (25.0%)                  |
| <b>Psychometric characteristics</b>                                                         |        |                            |                             |                            |
| <b>Age at diagnosis in years, mean (<math>\pm</math>SD; range)</b>                          |        | 34.5 ( $\pm$ 12.2; 18–53)  | 36.3 ( $\pm$ 12.2; 21–53)   | 31.8 ( $\pm$ 13.5; 18–49)  |
| <b>Current episode in weeks, mean (<math>\pm</math>SD; range)</b>                           |        | 33.6 ( $\pm$ 21.2; 3–68)   | 24.8 ( $\pm$ 15.2; 3–48)*   | 60.0 ( $\pm$ 11.3; 52–68)* |
| <b>BDI, mean (<math>\pm</math>SD; range)</b>                                                |        | 37.4 ( $\pm$ 11.9; 16–56)  | 37.1 ( $\pm$ 12.9; 16–56)   | 38.0 ( $\pm$ 11.5; 24–52)  |
| <b>MADRS, mean (<math>\pm</math>SD; range)</b>                                              |        | 29.4 ( $\pm$ 10.0; 12–43)  | 30.5 ( $\pm$ 13.0; 12–43)   | 27.8 ( $\pm$ 3.5; 24–32)   |
| <b>MMSE, mean (<math>\pm</math>SD; range)</b>                                               |        | 28.2 ( $\pm$ 2.8; 21–30)   | 27.7 ( $\pm$ 3.4; 21–30)    | 29.0 ( $\pm$ 1.4; 27–30)   |
| <b>Psychotic symptoms, n (%)</b>                                                            | yes    | 4 (33.3%)                  | 3 (37.5%)                   | 1 (25.0%)                  |
| <b>Suicidality, n (%)</b>                                                                   | yes    | 2 (16.7%)                  | 0 (0.0%)                    | 2 (50.0%)                  |
| <b>Medication</b>                                                                           |        |                            |                             |                            |
| <b>Antidepressant drugs, n (%)</b>                                                          | yes    | 12 (100.0%)                | 8 (100.0%)                  | 4 (100.0%)                 |
| <b>Benzodiazepines, n (%)</b>                                                               | yes    | 7 (58.3%)                  | 6 (75.0%)                   | 1 (25.0%)                  |
| <b>Antipsychotic drugs, n (%)</b>                                                           | yes    | 8 (66.7%)                  | 6 (75.0%)                   | 2 (50.0%)                  |
| <b>Lithium, n (%)</b>                                                                       | yes    | 2 (16.7%)                  | 1 (12.5%)                   | 1 (25.0%)                  |
| <b>Clinical parameters</b>                                                                  |        |                            |                             |                            |
| <b>Leukocytes in <math>\times 10^3/\mu\text{l}</math>, mean (<math>\pm</math>SD; range)</b> |        | 7.5 ( $\pm$ 2.3; 4.3–12.4) | 8.4 ( $\pm$ 2.2; 6.5–12.4)* | 5.7 ( $\pm$ 1.2; 4.3–7.1)* |

**Table S1: Patients' clinical baseline characteristics (n=12).** Clinical baseline characteristics of treatment-resistant MDD patients undergoing a course of ECT (whole cohort vs. responders/non-responders), presented as mean ( $\pm$ standard deviation (SD); range (=minimum – maximum)) or quantity (absolute and percentual, n (%)); \*p<0.01

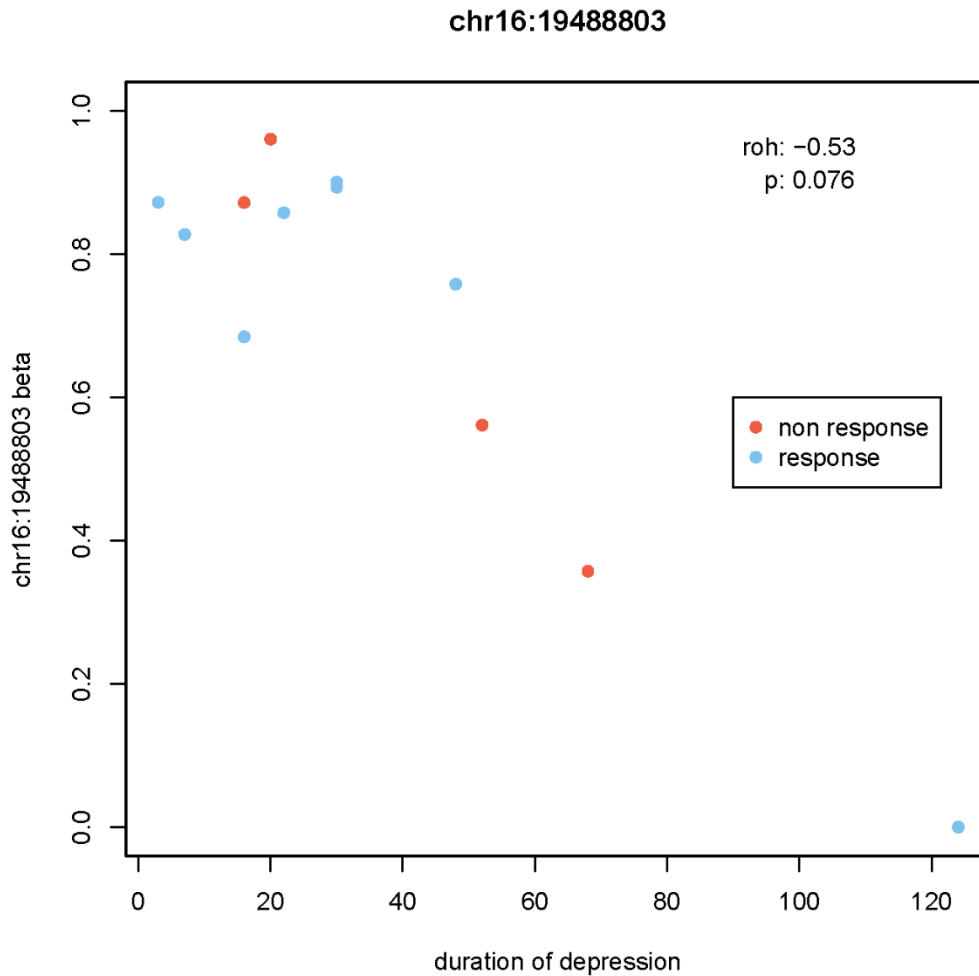

**Figure S1: Influence of the Current Episode Duration on DNA Methylation.** As the duration of the current depressive episode differed between ECT responders (n=8) and non-responders (n=4) in the subgroup of patients analyzed (with ECT non-responders suffering from episodes more than twice as long), we conducted an additional correlation analysis by using a Spearman rank-order correlation test. None of our CpG sites reached statistical significance, though a tendency at the gene locus chr16:19488803 (*TMC5*) was present ( $\rho=-0.53$ ,  $S=437.53$ ,  $p=0.076$ ).
